# Supplementary material for: Genomic Consequences of Fragmentation in the Endangered Fennoscandian Arctic Fox (Vulpes lagopus)
Source: MDPI journal article supplement (doi:10.3390/genes13112124), 2022-11-15
Supplement: s1 [file s1]

## Supplementary information

# Genomic Consequences of Fragmentation in the Endangered Fennoscandian Arctic Fox (*Vulpes lagopus*)

Christopher A. Cockerill, Malin Hasselgren, Nicolas Dussex, Love Dalén, Johanna von Seth, Anders Angerbjörn, Johan F. Wallén, Arild Landa, Nina E. Eide, Øystein Flagstad, Dorothee Ehrich, Aleksandr Sokolov, Natalya Sokolova and Karin Norén

**Table S1:** Genome-based individual genetic variation in the sample areas of northern Fennoscandia and Siberia. Sequencing coverage; Het/kb = heterozygous sites per 1000 bp;  $F_{ROH} > 100\text{kb}$  = proportion of genome contained within ROH larger than 100 kb;  $F_{ROH} > 2\text{ Mb}$  = proportion of genome contained in ROH larger than 2 Mb;  $F_{ROH} > 8\text{Mb}$  = proportion of genome contained in ROH larger than 8 Mb.

| Sample | Sample area   | Coverage | Het/kb | $F_{ROH} > 100\text{kb}$ | $F_{ROH} > 2\text{ Mb}$ | $F_{ROH} > 8\text{ Mb}$ | ENA Project ID |
|--------|---------------|----------|--------|--------------------------|-------------------------|-------------------------|----------------|
| 0413   | Vindelfjällen |          | 1.75   | 0.200                    | 0.120                   | 0.077                   | PRJEB55788     |
| 0416   | Vindelfjällen |          | 1.71   | 0.238                    | 0.154                   | 0.107                   | PRJEB55788     |
| 0592   | Vindelfjällen |          | 1.86   | 0.168                    | 0.082                   | 0.038                   | PRJEB55788     |
| 0596   | Vindelfjällen |          | 1.82   | 0.169                    | 0.086                   | 0.029                   | PRJEB55788     |
| 0760   | Vindelfjällen |          | 1.45   | 0.354                    | 0.286                   | 0.249                   | PRJEB55788     |
| 0883   | Vindelfjällen |          | 1.71   | 0.223                    | 0.122                   | 0.059                   | PRJEB55788     |
| 1491   | Vindelfjällen |          | 1.87   | 0.184                    | 0.103                   | 0.047                   | PRJEB55788     |
| 1607   | Vindelfjällen |          | 1.78   | 0.213                    | 0.141                   | 0.091                   | PRJEB55788     |
| 1714   | Vindelfjällen |          | 1.80   | 0.208                    | 0.116                   | 0.065                   | PRJEB55788     |
| 1967   | Vindelfjällen |          | 1.82   | 0.177                    | 0.092                   | 0.027                   | PRJEB55788     |
| 8917   | Vindelfjällen |          | 1.80   | 0.202                    | 0.130                   | 0.053                   | PRJEB55788     |
| 11113  | Vindelfjällen |          | 1.63   | 0.271                    | 0.205                   | 0.151                   | PRJEB55788     |
| 11119  | Vindelfjällen |          | 1.65   | 0.263                    | 0.182                   | 0.117                   | PRJEB55788     |
| 14170  | Vindelfjällen |          | 1.81   | 0.194                    | 0.122                   | 0.076                   | PRJEB55788     |
| 15158  | Vindelfjällen |          | 1.75   | 0.224                    | 0.130                   | 0.079                   | PRJEB55788     |
| 0875   | Arjeplog      |          | 1.43   | 0.382                    | 0.308                   | 0.232                   | PRJEB55788     |
| 0877   | Arjeplog      |          | 1.41   | 0.365                    | 0.295                   | 0.228                   | PRJEB55788     |
| 1976   | Arjeplog      |          | 1.71   | 0.239                    | 0.154                   | 0.101                   | PRJEB55788     |
| 14176  | Arjeplog      |          | 1.66   | 0.272                    | 0.189                   | 0.144                   | PRJEB55788     |
| 14182  | Arjeplog      |          | 1.61   | 0.304                    | 0.219                   | 0.156                   | PRJEB55788     |
| 18110  | Arjeplog      |          | 1.71   | 0.241                    | 0.153                   | 0.091                   | PRJEB55788     |
| 19088  | Arjeplog      |          | 1.77   | 0.227                    | 0.142                   | 0.091                   | PRJEB55788     |
| 19089  | Arjeplog      |          | 1.87   | 0.238                    | 0.160                   | 0.103                   | PRJEB55788     |
| 19091  | Arjeplog      |          | 1.84   | 0.162                    | 0.082                   | 0.022                   | PRJEB55788     |
| 19099  | Arjeplog      |          | 1.82   | 0.192                    | 0.112                   | 0.067                   | PRJEB55788     |
| 19104  | Arjeplog      |          | 1.80   | 0.203                    | 0.122                   | 0.063                   | PRJEB55788     |
| 5973   | Dividalen     |          | 1.80   | 0.203                    | 0.110                   | 0.065                   | PRJEB55788     |
| 5965   | Reisa Nord    |          | 1.84   | 0.167                    | 0.079                   | 0.025                   | PRJEB55788     |
| 5966   | Saltfjellet   |          | 1.72   | 0.143                    | 0.056                   | 0.017                   | PRJEB55788     |
| 2692   | Varanger      |          | 1.86   | 0.179                    | 0.108                   | 0.064                   | PRJEB55788     |
| 2230   | Taymyr        |          | 2.07   | 0.034                    | 0.009                   | 0.004                   | PRJEB55788     |
| 2232   | Taymyr        |          | 2.07   | 0.035                    | 0.009                   | 0.004                   | PRJEB55788     |
| 5003   | Taymyr        |          | 2.07   | 0.027                    | 0.004                   | 0                       | PRJEB55788     |
| 5011   | Taymyr        |          | 2.07   | 0.022                    | 0                       | 0                       | PRJEB55788     |

|      |                       |      |       |       |       |            |
|------|-----------------------|------|-------|-------|-------|------------|
| 6220 | Taymyr                | 2.09 | 0.023 | 0.004 | 0     | PRJEB55788 |
| 3108 | Yamal                 | 2.06 | 0.048 | 0.024 | 0.016 | PRJEB55788 |
| 3112 | Yamal                 | 2.1  | 0.022 | 0.002 | 0     | PRJEB55788 |
| 3120 | Yamal                 | 2.07 | 0.038 | 0.009 | 0     | PRJEB55788 |
| 5974 | Yamal                 | 1.87 | 0.040 | 0.012 | 0     | PRJEB55788 |
| 5967 | Kola                  | 1.81 | 0.010 | 0.051 | 0.029 | PRJEB55788 |
| 9472 | Indigirka             | 2.05 | 0.037 | 0.010 | 0     | PRJEB55788 |
| 9474 | Faddeyevsky<br>Island | 2.09 | 0.033 | 0.007 | 0.006 | PRJEB55788 |
| 8004 | Wrangel<br>Island     | 2.1  | 0.032 | 0.007 | 0     | PRJEB55788 |

**Table S2:** Results of the post hoc Dunn's tests showing significance of difference of genome-wide heterozygosity among northern Sweden, northern Norway, Kola, Yamal, Taymyr and eastern Siberia. Significant values in bold with \*  $P < 0.05$ , \*\*  $P < 0.01$ , \*\*\* $P < 0.001$ .

| FROH            | Eastern Siberia | Kola | Northern Norway | Northern Sweden  | Taymyr |
|-----------------|-----------------|------|-----------------|------------------|--------|
| Kola            | NS              | -    | -               | -                | -      |
| Northern Norway | NS              | NS   | -               | -                | -      |
| Northern Sweden | <b>0.0253*</b>  | NS   | NS              | -                | -      |
| Taymyr          | NS              | NS   | NS              | <b>0.00311**</b> | -      |
| Yamal           | NS              | NS   | NS              | <b>0.0253*</b>   | NS     |

**Table S3:** Results of the post hoc Dunn's tests, showing significance of difference in inbreeding due to common ancestors less than 10 generations ago among northern Sweden, northern Norway, Kola, Yamal, Taymyr and eastern Siberia. Significant values in bold with \*  $P < 0.05$ , \*\*  $P < 0.01$ , \*\*\* $P < 0.001$ .

| FROH            | Eastern Siberia | Kola | Northern Norway | Northern Sweden  | Taymyr |
|-----------------|-----------------|------|-----------------|------------------|--------|
| Kola            | NS              | -    | -               | -                | -      |
| Northern Norway | NS              | NS   | -               | -                | -      |
| Northern Sweden | <b>0.0321*</b>  | NS   | NS              | -                | -      |
| Taymyr          | NS              | NS   | NS              | <b>0.00211**</b> | -      |
| Yamal           | NS              | NS   | NS              | <b>0.00702**</b> | NS     |

**Table S4:** Results of the post hoc Dunn's tests, showing significance of difference in inbreeding due to common ancestors up to 45 generations back among northern Sweden, northern Norway, Kola, Yamal, Taymyr and eastern Siberia. Significant values in bold with \*  $P < 0.05$ , \*\*  $P < 0.01$ , \*\*\* $P < 0.001$ .

| FROH            | Eastern Siberia | Kola | Northern Norway | Northern Sweden    | Taymyr |
|-----------------|-----------------|------|-----------------|--------------------|--------|
| Kola            | NS              | -    | -               | -                  | -      |
| Northern Norway | NS              | NS   | -               | -                  | -      |
| Northern Sweden | <b>0.033*</b>   | NS   | NS              | -                  | -      |
| Taymyr          | NS              | NS   | NS              | <b>0.000475***</b> | -      |
| Yamal           | NS              | NS   | NS              | <b>0.0189*</b>     | NS     |

**Table S5:** Results of the post hoc Dunn's tests showing significance of difference in inbreeding due to common ancestors 850 generations among northern Sweden, northern Norway, Kola, Yamal, Taymyr and eastern Siberia. Significant values in bold with \* P<0.05, \*\* P<0.01, \*\*\*P<0.001.

| F <sub>ROH</sub> | Eastern Siberia | Kola | Northern Norway | Northern Sweden   | Taymyr |
|------------------|-----------------|------|-----------------|-------------------|--------|
| Kola             | NS              | -    | -               | -                 | -      |
| Northern Norway  | NS              | NS   | -               | -                 | -      |
| Northern Sweden  | <b>0.0305*</b>  | NS   | NS              | -                 | -      |
| Taymyr           | NS              | NS   | NS              | <b>0.00053***</b> | -      |
| Yamal            | NS              | NS   | NS              | <b>0.0232*</b>    | NS     |

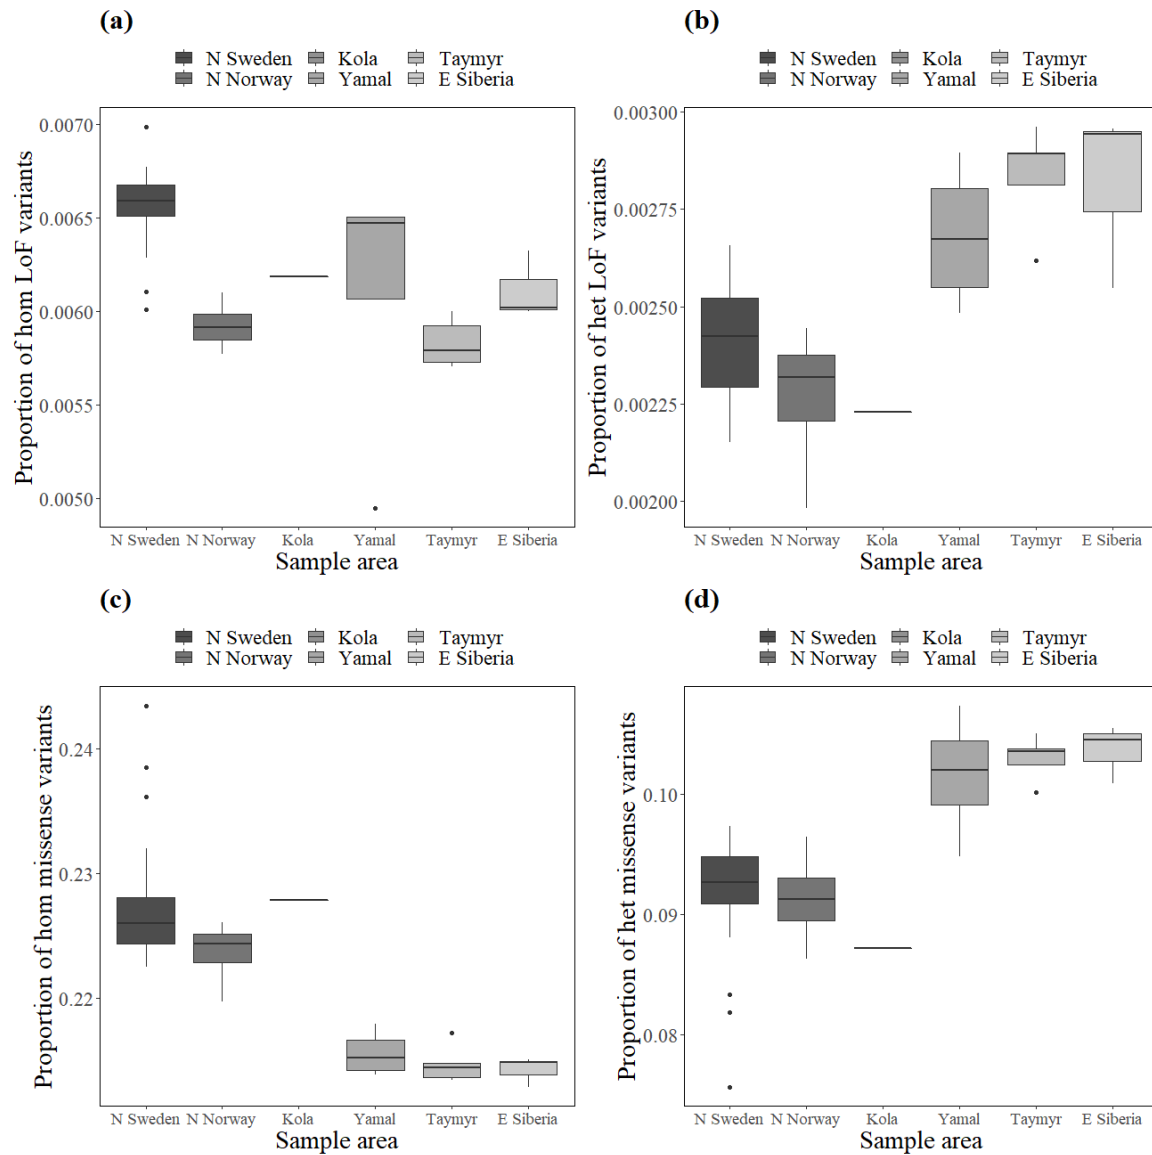

**Figure S1:** Proportion of deleterious variants in arctic foxes of the northern Sweden, northern Norway, Kola, Yamal, Taymyr and eastern Siberia sample areas; separated into (a) homozygous loss of function variants (LoF), (b) heterozygous LoF variants, (c) homozygous missense variants, and (d) heterozygous missense variants. Proportion calculated as the number of each variant type divided by total variants. The horizontal bar shows the median, the boxes show the 25–75% interquartile range and the whiskers show the whole range.
